# Supplementary material
Source: PubMed Central journal article supplement (PMC7380558)
Supplement: NIHMS1531812-supplement-1.pdf [file NIHMS1531812-supplement-1.pdf]

**Supplemental Tables:**

**Table E1: Characteristics of Subjects requiring Repeat Almond Challenges**

| Subject | Almond SPT (mm) / IgE (kU/L)                           | Challenge 1 Outcome/Sx                                               | Challenge 2 Outcome/Sx                        | Challenge 3 Outcome/Sx | Time Interval  |
|---------|--------------------------------------------------------|----------------------------------------------------------------------|-----------------------------------------------|------------------------|----------------|
| 1       | SPT 6, IgE 29.2                                        | Fail (oral itch, nasal symptoms, hives)                              | Pass                                          | -                      | 2.7 y          |
| 2       | SPT 5, IgE 34.50<br>SPT 5, IgE 23.20                   | Fail (severe generalized pruritus, irritability)                     | Pass                                          |                        | 4 y            |
| 3       | SPT 5, IgE 8.74<br>SPT 10, IgE 1.13                    | Fail (throat itch, lip pruritus)                                     | Pass                                          |                        | 3.2 y          |
| 4       | SPT 7, IgE 0.72<br>SPT 0, IgE 0.34                     | Fail (pruritus and flushing)                                         | Pass                                          |                        | 3.7 y          |
| 5       | SPT 2, IgE 0.88<br>SPT 3, IgE 0.50                     | Fail (diffuse wheezing, later attributed to uncontrolled asthma)     | Pass                                          |                        | 0.4 y          |
| 6       | SPT 5, IgE 0.90                                        | Indeterminate (gagged and refused)                                   | Pass                                          |                        | 0.8 y          |
| 7       | SPT 4, IgE 1.14<br>SPT 4, IgE 2.89                     | Pass (did not reintroduce due to intense abdominal pain hours later) | Pass                                          |                        | 4.2 y          |
| 8       | SPT 5, IgE 0.34                                        | Pass (had eye swelling hours after challenge)                        | Pass                                          |                        | 0.3 y          |
| 9       | SPT 5, IgE 0.42<br>SPT 14, IgE 43.3                    | Pass (had difficulty with home introduction)                         | Fail (oral itch, 10-12 hives, abdominal pain) |                        | 2 y            |
| 10      | SPT 0, IgE 0.34<br>SPT 0, IgE 0.34<br>SPT 4, IgE 0.43  | Fail (few hives)                                                     | Indeterminate (fever, 1 hive)                 | Pass                   | 3.7 y<br>0.4 y |
| 11      | SPT 5, IgE 0.34<br>SPT 0, IgE 0.44<br>SPT 10, IgE 0.54 | Fail (several hives)                                                 | Indeterminate (1 hive)                        | Pass                   | 1.2 y<br>3.3 y |

**Table E2. Sensitivity Analysis of Sensitized participants (n=475): Allergic Clinical Characteristics associated with IgE-mediated reaction.** OR for specific IgE represent the increased odds for every 10 kU/L change in IgE. OR for SPT represent the increased odds for every 5 mm change in wheal.

|                                      | <b>Unadj. OR<br/>[95% CI]</b> | <b>p</b> |
|--------------------------------------|-------------------------------|----------|
| <b><u>Demographics</u></b>           |                               |          |
| Age at challenge in years, mean (sd) | 0.86<br>[0.77, 0.96]          | 0.009    |
| <b><u>Almond History</u></b>         |                               |          |
| Almond-specific IgE, mean (sd)       | 1.45<br>[1.18, 1.8]           | <0.001   |
| Almond SPT in mm, mean (sd)          | 2.48<br>[1.48, 4.15]          | <0.001   |
| <b><u>Allergic Sensitization</u></b> |                               |          |
| Peanut IgE, mean (sd)                | 1.13<br>[1.02, 1.26]          | 0.02     |
| Pistachio IgE, mean (sd)             | 1.13<br>[0.97, 1.32]          | 0.12     |
| Pecan IgE, mean (sd)                 | 1.19<br>[0.96, 1.47]          | 0.12     |
| Walnut IgE, mean (sd)                | 1.13<br>[0.99, 1.29]          | 0.08     |

**Table E3: Specificity and Sensitivity of Almond-specific IgE (left) and Almond SPT (right) for IgE-mediated reactions.** Positive predictive values (PPV), Negative Predictive values (NPV), Likelihood Ratios – positive (LR+), Likelihood Ratios – negative (LR-)

| <b>Outcome</b>            | <b>Test</b> | <b>Value</b> | <b>Sensitivity</b> | <b>Specificity</b> | <b>PPV</b> | <b>NPV</b> | <b>LR+</b> | <b>LR-</b> |
|---------------------------|-------------|--------------|--------------------|--------------------|------------|------------|------------|------------|
| <b>Challenge Outcome</b>  | Almond SPT  | 7            | 1                  | 0                  | 0.05       | 1          | 1          | 0          |
|                           |             | 8            | 0.21               | 0.88               | 0.09       | 0.95       | 1.77       | 0.9        |
|                           |             | 9            | 0.21               | 0.94               | 0.17       | 0.95       | 3.61       | 0.84       |
|                           |             | 10           | 0.14               | 0.98               | 0.27       | 0.95       | 6.34       | 0.88       |
|                           |             | 11           | 0.14               | 0.99               | 0.36       | 0.95       | 9.97       | 0.87       |
|                           |             | 12           | 0.1                | 0.99               | 0.33       | 0.95       | 8.72       | 0.91       |
|                           |             | 14           | 0.07               | 0.99               | 0.29       | 0.95       | 6.98       | 0.94       |
|                           |             | 16           | 0.07               | 0.99               | 0.4        | 0.95       | 11.63      | 0.94       |
| <b>Grade 2/3 Reaction</b> | Almond SPT  | 4            | 1                  | 0                  | 0.04       | 1          | 1          | 0          |
|                           |             | 6            | 0.25               | 0.84               | 0.06       | 0.97       | 1.53       | 0.9        |
|                           |             | 7            | 0.25               | 0.94               | 0.14       | 0.97       | 4.29       | 0.8        |
|                           |             | 8            | 0.2                | 0.97               | 0.21       | 0.97       | 6.87       | 0.82       |
|                           |             | 9            | 0.15               | 0.98               | 0.21       | 0.97       | 7.02       | 0.87       |
|                           |             | 10           | 0.15               | 0.99               | 0.3        | 0.97       | 11.04      | 0.86       |
|                           |             | 12           | 0.15               | 0.99               | 0.38       | 0.97       | 15.45      | 0.86       |
|                           |             | 13           | 0.1                | 0.99               | 0.33       | 0.97       | 12.87      | 0.91       |
| <b>Challenge Outcome</b>  | Almond IgE  | 0            | 1                  | 0                  | 0.05       | 1          | 1          | 0          |
|                           |             | 1            | 0.69               | 0.54               | 0.08       | 0.97       | 1.5        | 0.58       |
|                           |             | 2.25         | 0.31               | 0.71               | 0.06       | 0.95       | 1.08       | 0.97       |
|                           |             | 10           | 0.21               | 0.93               | 0.15       | 0.95       | 2.99       | 0.85       |
| <b>Grade 2/3 Reaction</b> | Almond IgE  | 0.25         | 1                  | 0                  | 0.04       | 1          | 1          | 0          |
|                           |             | 1.25         | 0.8                | 0.56               | 0.07       | 0.99       | 1.8        | 0.36       |
|                           |             | 2            | 0.4                | 0.68               | 0.05       | 0.97       | 1.25       | 0.88       |
|                           |             | 10           | 0.25               | 0.93               | 0.12       | 0.97       | 3.39       | 0.81       |
|                           |             | 15           | 0.25               | 0.97               | 0.23       | 0.97       | 7.57       | 0.78       |

**Table E4: Details of failed challenge reactions and characterization:** Niggemann-Beyer reaction severity: Grade 1 (redness, swelling (not angioedema), or pruritus); Grade 2 (urticaria, angioedema, generalized flushing, abdominal pain, vomiting, or diarrhea); Grade 3 (cough, wheezing, stridor, tachycardia, decreased blood pressure, respiratory distress, shock, cardiac arrest). \*patient had transient wheeze and nasal congestion at baseline, then during the challenge had worsening wheeze and sneezed three times. Supervising clinician attributed symptoms to asthma exacerbation. \*\*patient had nasal congestion during challenge but during home introduction with exercise the next day, developed urticaria.

|    | <b>N-B reaction severity</b> | <b>Sampson 2006</b> | <b>Symptoms reported</b>                                          | <b>Treatment given</b>                            |
|----|------------------------------|---------------------|-------------------------------------------------------------------|---------------------------------------------------|
| 1  | Grade 2                      | no                  | pruritus, urticaria                                               | antihistamines                                    |
| 2  | Grade 1                      | no                  | throat pruritus                                                   | antihistamines                                    |
| 3  | Grade 1                      | no                  | oral pruritus                                                     | antihistamines                                    |
| 4  | Grade 2                      | no                  | nasal congestion, urticaria (with exercise)**                     | none                                              |
| 5  | Grade 1                      | no                  | oral sensitivity                                                  | antihistamines                                    |
| 6  | Grade 1                      | no                  | oral itch, facial redness, non urticarial rash                    | none                                              |
| 7  | Grade 2                      | no                  | urticaria, pruritus                                               | none                                              |
| 8  | Grade 1                      | no                  | oral pruritus, facial redness                                     | antihistamines                                    |
| 9  | Grade 1                      | no                  | facial redness, pruritus, nasal congestion                        | antihistamines                                    |
| 10 | Grade 2                      | no                  | oral discomfort, urticaria                                        | antihistamines                                    |
| 11 | Grade 3                      | Anaphylaxis         | pruritus, flushing, urticaria, abdominal pain, vomiting, sneezing | antihistamines, epinephrine, steroids, H2 blocker |
| 12 | Grade 3                      | Anaphylaxis *       | wheezing*, sneezing x 3                                           | antihistamines, albuterol                         |
| 13 | Grade 1                      | no                  | palmar pruritus                                                   | antihistamines                                    |
| 14 | Grade 2                      | no                  | urticaria, sneezing, nasal congestion                             | none                                              |
| 15 | Grade 2                      | no                  | urticaria, nasal congestion                                       | antihistamines                                    |
| 16 | Grade 2                      | no                  | oral pruritus, urticaria, mild abdominal pain                     | antihistamines                                    |
| 17 | Grade 1                      | no                  | sneezing and nasal congestion                                     | antihistamines                                    |
| 18 | Grade 2                      | no                  | pruritus, urticaria                                               | none                                              |
| 19 | Grade 1                      | no                  | taste aversion, refused to consume                                | none                                              |
| 20 | Grade 2                      | no                  | urticaria                                                         | antihistamines                                    |
| 21 | Grade 2                      | no                  | urticaria, non-urticarial rash                                    | antihistamines                                    |
| 22 | Grade 2                      | no                  | vomiting, sneeze x 1                                              | none                                              |
| 23 | Grade 2                      | no                  | sneezing, congestion, throat pruritus, throat clearing            | none                                              |
| 24 | Grade 2                      | no                  | pruritus, urticaria                                               | antihistamines                                    |
| 25 | Grade 2                      | no                  | pruritus, urticaria                                               | antihistamines                                    |
| 26 | Grade 3                      | Anaphylaxis         | nasal congestion, wheezing, urticaria                             | antihistamines, epinephrine,                      |

---

|           |         |    |                                                                                  |                            |
|-----------|---------|----|----------------------------------------------------------------------------------|----------------------------|
|           |         |    |                                                                                  | steroids, H2 blocker       |
| <b>27</b> | Grade 2 | no | urticaria, local flushing, mild lip angioedema, nasal congestion                 | antihistamines             |
| <b>28</b> | Grade 2 | no | oral itch, ear angioedema, local flushing, nasal congestion, mild abdominal pain | antihistamines             |
| <b>29</b> | Grade 2 | no | oral itch, vomiting                                                              | antihistamines, H2 blocker |
| <b>30</b> | Grade 2 | no | urticaria                                                                        | none                       |

---
